# Supplementary material
Source: publisher site journal article supplement (https://www.spandidos-publications.com/2445/downloadSupplementary)
Supplement: Supplementary file 1 [file downloadSupplementary]

## Sheet: Supp table 5
Table SV. Full list of genomic alterations in patient samples.
mut	plasma (50)	urine (45)	RTKCP190022.plasma	RTKCP190083.urin	RTKCP190023.plasma	RTKCP190091.urin	RTKCP190025.plasma	RTKCP190087.urin	RTKCP190026.plasma	RTKCP190093.urin	RTKCP190027.plasma	RTKCP190119.urin	RTKCP190028.plasma	RTKCP190092.urin	RTKCP190029.plasma	RTKCP190081.urin	RTKCP190030.plasma	RTKCP190085.urin	RTKCP190031.plasma	RTKCP190110.urin	RTKCP190032.plasma	RTKCP190089.urin	RTKCP190033.plasma	RTKCP190095.urin	RTKCP190034.plasma	RTKCP190097.urin	RTKCP190035.plasma	RTKCP190100.urin	RTKCP190036.plasma	RTKCP190106.urin	RTKCP190037.plasma	RTKCP190099.urin	RTKCP190038.plasma	RTKCP190113.urin	RTKCP190039.plasma	RTKCP190108.urin	RTKCP190040.plasma	RTKCP190120.urin	RTKCP190041.plasma	RTKCP190072.urin	RTKCP190042.plasma	RTKCP190105.urin	RTKCP190043.plasma	RTKCP190118.urin	RTKCP190044.plasma	RTKCP190116.urin	RTKCP190045.plasma	RTKCP190078.urin	RTKCP190047.plasma
PTEN.NM_001304717.p.65_66del	10	22	0	0	0.0243	0.0203	0	0.0247	0	0	0	0.0213	0	0.0289	0	0.0508	0	0	0	0	0	0	0.0217	0	0	0.0206	0	0	0	0	0	0	0	0.0235	0	0	0.0203	0	0	0.0203	0	0.0207	0	0.0323	0	0.0218	0	0	0
GNAS.NM_001077490.p.Q371R	9	12	0.0306	0.0371	0	0.0297	0	0.0266	0	0	0	0	0	0	0	0	0	0	0	0	0.0292	0	0	0.0277	0	0	0	0	0.0248	0	0	0	0	0	0	0	0	0	0.0242	0.0273	0	0	0.0294	0	0	0.0251	0	0	0
GNAS.NM_001077490.p.D448A	9	10	0.0291	0	0	0.0259	0	0.0282	0	0	0	0	0	0	0	0	0	0	0	0	0	0	0	0.0239	0	0	0	0	0.0354	0	0	0	0	0	0	0	0.0238	0	0	0.0211	0	0	0	0.0341	0	0	0	0	0
MYC.NM_002467.p.Q48H	8	0	0.0291	0	0	0	0	0	0	0	0	0	0	0	0	0	0	0	0	0	0.0229	0	0	0	0	0	0	0	0.0247	0	0	0	0	0	0	0	0	0	0.0257	0	0	0	0	0	0	0	0	0	0
HNF1A.NM_000545.p.G288fs	4	8	0	0	0	0	0	0	0	0	0.0283	0.0384	0	0	0	0.0326	0	0	0	0	0.0219	0.0497	0	0	0	0	0	0	0	0	0	0	0	0	0	0	0.0218	0.0245	0	0	0	0	0	0	0	0	0	0	0
FGFR4.NM_002011.p.P400fs	3	16	0.0507	0	0	0	0	0.0431	0	0	0	0	0	0	0	0	0	0.0218	0	0	0	0	0	0.0292	0	0	0	0	0	0	0	0	0	0.0327	0	0	0	0	0	0.0319	0	0.0205	0	0.0454	0	0	0	0.0303	0
MET.NM_000245.p.N375D	3	0	0	0	0	0	0	0	0	0	0	0	0	0	0	0	0	0	0	0	0	0	0	0	0.0234	0	0	0	0	0	0	0	0	0	0	0	0	0	0	0	0	0	0	0	0	0	0.0255	0	0
MET.NM_000245.p.F63S	2	0	0	0	0	0	0	0	0	0	0	0	0	0	0	0	0	0	0	0	0	0	0	0	0	0	0	0	0	0	0	0	0	0	0	0	0	0	0	0	0	0	0	0	0	0	0.0214	0	0
JAK3.NM_000215.p.A248V	1	3	0	0	0	0	0	0	0	0	0	0	0	0	0	0	0	0	0	0	0	0	0	0	0	0	0	0	0	0	0	0	0	0	0	0	0	0	0	0	0	0	0	0.0231	0	0	0	0	0
PDGFRB.NM_002609.p.M635V	1	1	0	0	0	0	0	0	0	0	0	0	0	0	0	0	0	0	0	0	0	0	0	0	0	0	0	0	0	0	0	0	0	0	0	0	0	0	0	0	0.1218	0.142	0	0	0	0	0	0	0
RET.NM_020975.p.E366X	1	1	0	0	0	0	0	0	0	0	0	0	0	0	0	0	0	0	0	0	0	0	0	0	0	0	0	0	0	0	0	0	0	0	0	0	0	0	0.067	0.0541	0	0	0	0	0	0	0	0	0
AKT1.NM_005163.p.M343K	1	0	0	0	0	0	0	0	0	0	0	0	0	0	0	0	0	0	0	0	0	0	0	0	0	0	0	0	0	0	0	0	0	0	0	0	0	0	0	0	0	0	0	0	0.1037	0	0	0	0
AURKA.NM_003600.p.A167S	1	0	0	0	0	0	0.0733	0	0	0	0	0	0	0	0	0	0	0	0	0	0	0	0	0	0	0	0	0	0	0	0	0	0	0	0	0	0	0	0	0	0	0	0	0	0	0	0	0	0
FLT1.NM_002019.p.E503X	1	0	0	0	0	0	0	0	0	0	0	0	0	0	0	0	0	0	0	0	0	0	0	0	0	0	0	0	0	0	0	0	0	0	0	0	0	0	0	0	0	0	0	0	0	0	0	0	0
IDH1.NM_005896.p.R132S	1	0	0	0	0	0	0	0	0	0	0	0	0	0	0	0	0	0	0	0	0	0	0	0	0	0	0	0	0	0	0	0	0	0	0	0	0	0	0	0	0	0	0.0302	0	0	0	0	0	0
MTOR.NM_004958.p.V2006F	1	0	0	0	0	0	0	0	0	0	0	0	0	0	0	0	0	0	0	0	0	0	0	0	0	0	0	0	0	0	0	0	0	0	0	0	0	0	0	0	0	0	0	0	0	0	0	0	0
MYD88.NM_001172566.p.X205R	1	0	0	0	0	0	0	0	0	0	0	0	0	0	0	0	0	0	0	0	0	0	0	0	0	0	0	0	0	0	0	0	0	0	0	0	0	0	0	0	0	0	0	0	0	0	0	0	0
RICTOR.NM_152756.p.A3V	1	0	0	0	0	0	0	0	0	0	0	0	0	0	0	0	0	0	0	0	0.024	0	0	0	0	0	0	0	0	0	0	0	0	0	0	0	0	0	0	0	0	0	0	0	0	0	0	0	0
RICTOR.NM_152756.p.R8H	1	0	0.0265	0	0	0	0	0	0	0	0	0	0	0	0	0	0	0	0	0	0	0	0	0	0	0	0	0	0	0	0	0	0	0	0	0	0	0	0	0	0	0	0	0	0	0	0	0	0
TP53.NM_000546.p.L257V	1	0	0	0	0	0	0	0	0	0	0	0	0	0	0	0	0	0	0	0	0	0	0.0451	0	0	0	0	0	0	0	0	0	0	0	0	0	0	0	0	0	0	0	0	0	0	0	0	0	0
TP53.NM_000546.p.V272M	1	0	0	0	0	0	0	0	0	0	0	0	0	0	0.0862	0	0	0	0	0	0	0	0	0	0	0	0	0	0	0	0	0	0	0	0	0	0	0	0	0	0	0	0	0	0	0	0	0	0
FGFR4.NM_002011.p.P400H	0	17	0	0.0274	0	0.0374	0	0.0273	0	0	0	0.0202	0	0	0	0	0	0	0	0	0	0	0	0.0314	0	0.0248	0	0	0	0	0	0	0	0	0	0	0	0	0	0	0	0	0	0.0284	0	0.0237	0	0	0
FGFR4.NM_001291980.p.P644T	0	2	0	0	0	0	0	0	0	0	0	0	0	0	0	0	0	0	0	0	0	0	0	0.0218	0	0	0	0	0	0	0	0	0	0	0	0	0	0	0	0	0	0	0	0	0	0	0	0	0
GNAS.NM_001077490.p.A467S	0	2	0	0	0	0	0	0	0	0	0	0	0	0	0	0	0	0	0	0	0	0	0	0	0	0	0	0	0	0	0	0	0	0	0	0	0	0	0	0	0	0	0	0.0215	0	0	0	0	0
PDGFRB.NM_002609.p.P442S	0	2	0	0.0232	0	0	0	0	0	0	0	0	0	0	0	0	0	0	0	0	0	0	0	0	0	0	0	0	0	0	0	0	0	0	0	0	0	0	0	0	0	0	0	0	0	0	0	0	0
ALK.NM_004304.p.G923V	0	1	0	0	0	0	0	0	0	0	0	0	0	0	0	0	0	0	0	0	0	0	0	0	0	0	0	0	0	0	0	0	0	0	0	0	0	0	0	0	0	0	0	0	0	0	0	0	0
ATM.NM_000051.p.G2023R	0	1	0	0	0	0	0	0	0	0	0	0	0	0	0	0	0	0	0	0	0	0	0	0	0	0	0	0	0	0	0	0	0	0	0	0	0	0	0	0	0	0	0	0	0	0.3956	0	0	0
ESR1.NM_000125.p.A571V	0	1	0	0	0	0	0	0	0	0	0	0	0	0	0	0	0	0	0	0.0201	0	0	0	0	0	0	0	0	0	0	0	0	0	0	0	0	0	0	0	0	0	0	0	0	0	0	0	0	0
FCGR3A.NM_000569.p.P159S	0	1	0	0	0	0	0	0	0	0	0	0	0	0	0	0	0	0	0	0	0	0	0	0	0	0	0	0	0	0	0	0	0	0	0	0	0	0	0	0	0	0	0	0	0	0	0	0	0
GNAS.NM_001077490.p.P374Q	0	1	0	0	0	0	0	0	0	0	0	0	0	0	0	0	0	0	0	0	0	0	0	0	0	0	0	0	0	0	0	0	0	0	0	0	0	0	0	0	0	0	0	0	0	0	0	0	0
GNAS.NM_001077490.p.P391Q	0	1	0	0	0	0	0	0	0	0	0	0	0	0	0	0	0	0	0	0	0	0	0	0	0	0	0	0	0	0	0	0	0	0	0	0	0	0	0	0	0	0	0	0	0	0	0	0	0
GNAS.NM_001077490.p.Q403P	0	1	0	0	0	0	0	0	0	0	0	0	0	0	0	0	0	0	0	0	0	0	0	0	0	0	0	0	0	0	0	0	0	0	0	0	0	0	0	0	0	0	0	0.0254	0	0	0	0	0
MSH6.NM_000179.p.E1254D	0	1	0	0	0	0	0	0	0	0	0	0	0	0	0	0	0	0.3755	0	0	0	0	0	0	0	0	0	0	0	0	0	0	0	0	0	0	0	0	0	0	0	0	0	0	0	0	0	0	0
PDGFRB.NM_002609.p.G438D	0	1	0	0	0	0	0	0	0	0	0	0	0	0	0	0	0	0	0	0	0	0	0	0	0	0	0	0	0	0	0	0	0	0	0	0	0	0	0	0	0	0	0	0	0	0	0	0	0
PDGFRB.NM_002609.p.G440D	0	1	0	0	0	0	0	0	0	0	0	0	0	0	0	0	0	0	0	0	0	0	0	0	0	0	0	0	0	0	0	0	0	0	0	0	0	0	0	0	0	0	0	0	0	0	0	0	0
PIK3CA.NM_006218.p.I143V	0	1	0	0	0	0	0	0	0	0	0	0	0	0	0	0	0	0	0	0	0	0	0	0	0	0	0	0	0	0	0	0	0	0	0	0	0	0	0	0	0	0	0	0	0	0	0	0	0
RAD50.NM_005732.p.V315L	0	1	0	0	0	0	0	0	0	0	0	0	0	0	0	0	0	0	0	0	0	0	0	0	0	0	0	0	0	0	0	0	0	0	0	0	0	0	0	0	0	0	0	0	0	0	0	0	0
RICTOR.NM_152756.p.G5C	0	1	0	0.035	0	0	0	0	0	0	0	0	0	0	0	0	0	0	0	0	0	0	0	0	0	0	0	0	0	0	0	0	0	0	0	0	0	0	0	0	0	0	0	0	0	0	0	0	0
MET:NM_000245:p.V1220I	1	0	0	0	0	0	0	0	0	0	0	0	0	0	0	0	0	0	0	0	0	0	0	0	0	0	0	0	0	0	0	0	0	0	0	0	0	0	0	0	0	0	0	0	0	0	0	0	0
[truncated: 48 more columns]
